# Supplementary material for: An Exploratory Study of Daprodustat in Erythropoietin-Hyporesponsive Subjects
Source: PubMed Central journal article supplement — Kidney Int Rep. 2018 Mar 3;3(4):841–50. doi: 10.1016/j.ekir.2018.02.009 (PMC6035126; doi:10.1016/j.ekir.2018.02.009), 2018-03-03
Supplement: mmc2.pdf [file mmc2.pdf]

**Table S1: All on-therapy adverse events and serious adverse events (safety population)**

| <b>System organ class preferred term</b>           | <b>All AEs, n (%)</b> | <b>SAEs,<sup>a</sup> n (%)</b> |
|----------------------------------------------------|-----------------------|--------------------------------|
| <b>Any event</b>                                   | 14 (93)               | 9 (60)                         |
| <b>Cardiac disorders</b>                           |                       |                                |
| Any event                                          | 4 (27)                | 4 (27)                         |
| Acute myocardial infarction                        | 1 (7)                 | 1 (7)                          |
| Angina unstable                                    | 1 (7)                 | 1 (7)                          |
| Cardiac arrest                                     | 1 (7)                 | 1 (7)                          |
| Ventricular tachycardia                            | 1 (7)                 | 1 (7)                          |
| <b>Infections and infestations</b>                 |                       |                                |
| Any event                                          | 5 (33)                | 3 (20)                         |
| Pneumonia                                          | 2 (13)                | 1 (7)                          |
| Urinary tract infection                            | 2 (13)                | 0                              |
| Pneumonia mycoplasmal                              | 1 (7)                 | 1 (7)                          |
| Gastroenteritis viral                              | 1 (7)                 | 1 (7)                          |
| Influenza                                          | 1 (7)                 | 0                              |
| Upper respiratory tract infection                  | 1 (7)                 | 0                              |
| <b>Injury, poisoning, procedural complications</b> |                       |                                |
| Any event                                          | 4 (27)                | 2 (13)                         |
| Gastrointestinal stoma complication                | 1 (7)                 | 1 (7)                          |
| Procedural hemorrhage                              | 1 (7)                 | 1 (7)                          |
| Arteriovenous fistula site complication            | 1 (7)                 | 0                              |
| Arteriovenous fistula thrombosis                   | 1 (7)                 | 0                              |
| <b>Vascular disorders</b>                          |                       |                                |
| Any event                                          | 4 (27)                | 2 (13)                         |

|                                                            |        |       |
|------------------------------------------------------------|--------|-------|
| Hematoma                                                   | 1 (7)  | 1 (7) |
| Shock                                                      | 1 (7)  | 1 (7) |
| Brachiocephalic vein stenosis                              | 1 (7)  | 0     |
| Venous stenosis                                            | 1 (7)  | 0     |
| <b>Gastrointestinal disorders</b>                          |        |       |
| Any event                                                  | 4 (27) | 1 (7) |
| Nausea                                                     | 3 (20) | 0     |
| Lower gastrointestinal hemorrhage                          | 1 (7)  | 1 (7) |
| Vomiting                                                   | 1 (7)  | 0     |
| <b>Investigations</b>                                      |        |       |
| Any event                                                  | 3 (20) | 0     |
| Blood calcium decreased                                    | 1 (7)  | 0     |
| Blood pressure increased                                   | 1 (7)  | 0     |
| Occult blood positive                                      | 1 (7)  | 0     |
| <b>General disorder and administration site conditions</b> |        |       |
| Any event                                                  | 2 (13) | 0     |
| Fatigue                                                    | 1 (7)  | 0     |
| Pyrexia                                                    | 1 (7)  | 0     |
| <b>Metabolism and nutrition disorders</b>                  |        |       |
| Any event                                                  | 2 (13) | 0     |
| Hyperkalaemia                                              | 1 (7)  | 0     |
| Malnutrition                                               | 1 (7)  | 0     |
| <b>Respiratory, thoracic and mediastinal disorders</b>     |        |       |
| Any event                                                  | 2 (13) | 0     |
| Pleural effusion                                           | 2 (13) | 0     |

| <b>Musculoskeletal and connective tissue disorders</b> |       |   |
|--------------------------------------------------------|-------|---|
| Any event                                              | 1 (7) | 0 |
| Pain in extremity                                      | 1 (7) | 0 |
| <b>Nervous system disorders</b>                        |       |   |
| Any event                                              | 1 (7) | 0 |
| Sinus headache                                         | 1 (7) | 0 |
| <b>Skin and subcutaneous tissue disorders</b>          |       |   |
| Any event                                              | 1 (7) | 0 |
| Pruritus                                               | 1 (7) | 0 |
| Pruritus generalized                                   | 1 (7) | 0 |

AE, adverse event; SAE, serious adverse event.

<sup>a</sup>Subset of all AEs that were serious.
