# Supplementary material for: An Exploratory Study of Daprodustat in Erythropoietin-Hyporesponsive Subjects
Source: PubMed Central journal article supplement — Kidney Int Rep. 2018 Mar 3;3(4):841–50. doi: 10.1016/j.ekir.2018.02.009 (PMC6035126; doi:10.1016/j.ekir.2018.02.009), 2018-03-03
Supplement: mmc3.pdf [file mmc3.pdf]

**Table S2 Participating Principal Investigators and Study Sites**

---

Nelson P. Kopyt, DO, FASN, FACP, Northeast Clinical Research Centers, Incorporated, Bethlehem, Pennsylvania

Aamir Z. Jamal, MD, Azusa Dialysis Center, Azusa, California

Steven Zeig, MD, Pines Clinical Research Incorporated, Hollywood, Florida

Samia A. Khwaja, MD, North America Research Institute, Azusa, California

Raffi Ralph Minasian, MD, Raffi Ralph Minasian, MD – A Medical Corporation, Glendale, California

Theodore Saul Herman, MD, Hypertension and Renal Research Group Incorporated, Amherst, New York

Jieshi Yan, MD, Simi Valley Dialysis, Simi Valley, California

---
